# Supplementary material for: Correlating Fluorescence and High-Resolution Scanning Electron Microscopy (HRSEM) for the study of GABAA receptor clustering induced by inhibitory synaptic plasticity
Source: PubMed Central journal article supplement (PMC5653763; doi:10.1038/s41598-017-14210-5), 2017-10-23
Supplement: 41598_2017_14210_MOESM1_ESM.pdf [file 41598_2017_14210_MOESM1_ESM.pdf]

# **Correlating Fluorescence and High-Resolution Scanning Electron Microscopy (HRSEM) for the study of GABA<sub>A</sub> receptor clustering induced by inhibitory synaptic plasticity**

Marta Orlando<sup>1±§</sup>, Tiziana Ravasenga<sup>1±</sup>, Enrica Maria Petrini<sup>1±</sup>, Andrea Falqui<sup>2</sup>, Roberto Marotta<sup>3#</sup> and Andrea Barberis<sup>1\*#</sup>

<sup>1</sup>Neuroscience and Brain Technologies Department, Fondazione Istituto Italiano di Tecnologia, Via Morego 30, Genoa, Italy

<sup>2</sup>Nabla Lab, Biological and Environmental Sciences and Engineering (BESE) Division, King Abdullah University of Science and Technology (KAUST), 23955-6900 Thuwal, Saudi Arabia

<sup>3</sup>Electron Microscopy Facility, Fondazione Istituto Italiano di Tecnologia, Via Morego 30, 16163 Genoa, Italy

± equal contribution

§ present address: Institute of Neurophysiology, Charité-Universitätsmedizin Berlin, Charitéplatz 1, 10117, Berlin, Germany

# co-last authors

\* Correspondence should be addressed to A.B. (email: [andrea.barberis@iit.it](mailto:andrea.barberis@iit.it))

**Keywords:** immuno-EM, SEM, inhibitory synapse, GABA<sub>A</sub> receptor, Electron Tomography, CL-HRSEM, synaptic plasticity

## Supplementary figures

Fig. S1

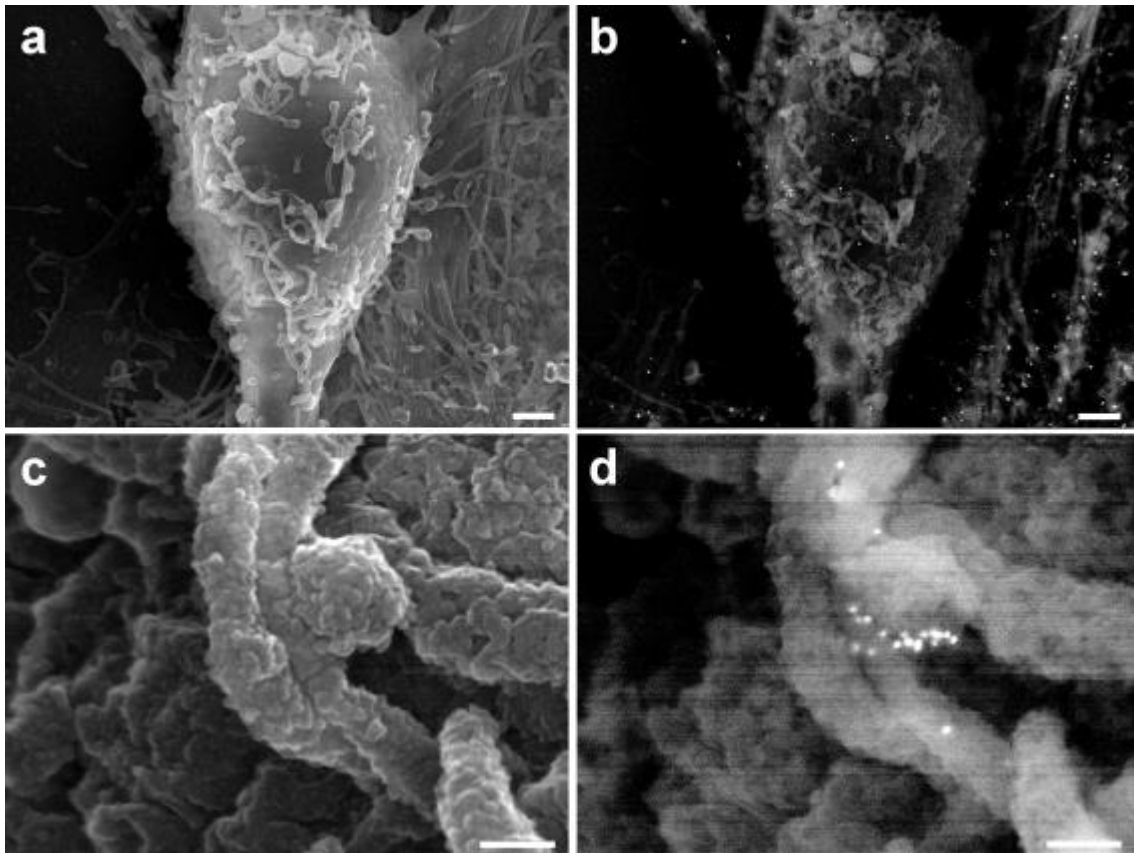

**Fig. S1. SE coupled with BSE images of GABA<sub>A</sub>R $\alpha$ 1 immunolabeled primary mouse hippocampal neurons using FluoroNanogold<sup>TM</sup> (a and b) and 10 nm colloidal gold particle-conjugated secondary antibody (c and d). a: low magnification SE image of a neuron cell body. b: BSE image of the same field of view shown in a. The white spots are the enhanced gold nanoparticles. c: high magnification SE image of a contact region between neurites, i.e. *bona fide* synaptic contact. d: BSE image of the same field of view shown in d. The white spots are the 10 nm gold nanoparticles. Scale bars: 1  $\mu$ m in a and b; 0.1  $\mu$ m in c and d.**

Fig. S2

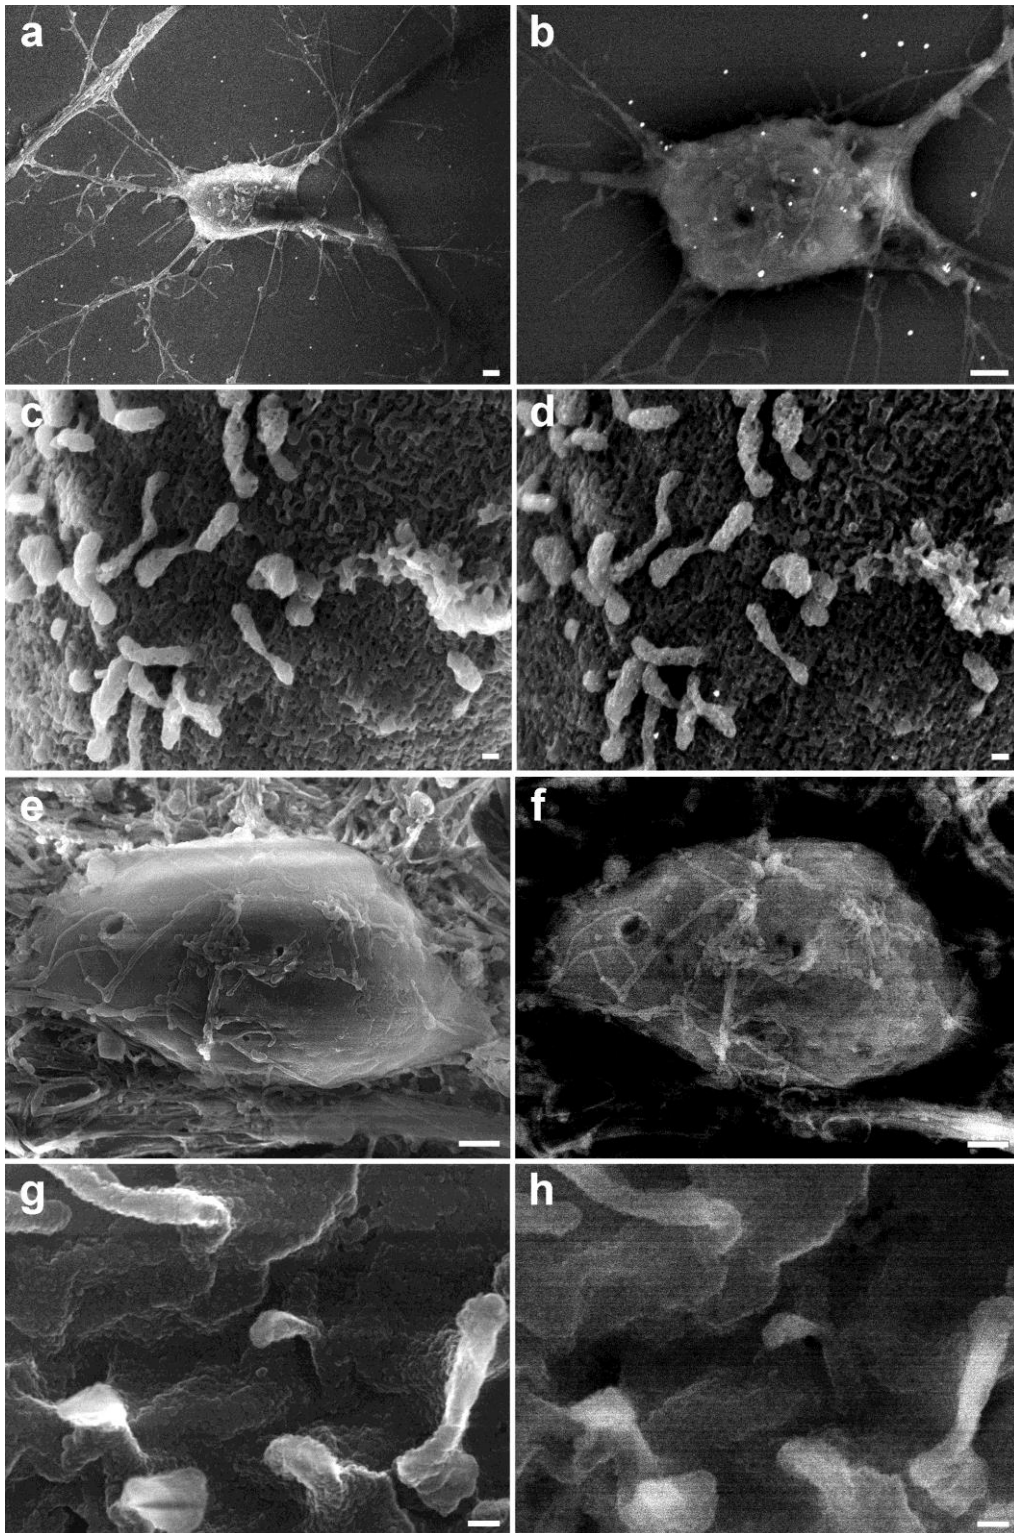

**Fig. S2. SE coupled with BSE images of negative control primary mouse hippocampal neurons using FluoroNanogold™ followed by gold enhancement (a-d) and 10 nm colloidal gold particle-conjugated secondary antibody (e-h).** a: low magnification SE image of a neuron cell body. b: BSE image of the same field of view shown in a. The large white spots on the coverslip and on the neuron are FluoroNanogold™ non-specific labelling. c: high magnification SE image of a cell body region. d: BSE image of the same field of view shown in c. The small white spots on the background are non-specific labelling produced by the gold enhancement reaction. The small white spots are the 10 nm gold nanoparticles. e: low magnification SE image of a neuron cell body. f: BSE image of the same field of view shown in e. g: high magnification SE image of a cell body region. h: BSE image of the same field of view shown in g. Scale bars: 1 μm in a, b and e, f; 0.1 μm in c, d and g, h.

**Table S1.** Average cluster density, average cluster size (n gold particles/cluster) and average number of clusters formed by  $n \leq 5$  and  $n > 5$  gold particles on the cell membrane of cell bodies and neurites of CTRL and NMDA stimulated hippocampal neurons.  $n_i$ =image number;  $n_c$ =cluster number. Values are average  $\pm$  s.e.m.

|              | Cluster average density $\pm$ s.e.m. ( $n/\mu m^2$ ) |          | Clusters size $\pm$ s.e.m. |            | Average number of clusters formed by n gold particles $\pm$ s.e.m. |                |            |
|--------------|------------------------------------------------------|----------|----------------------------|------------|--------------------------------------------------------------------|----------------|------------|
|              |                                                      |          |                            |            | $n \leq 5$                                                         | $n > 5$        | Total      |
| CTRL neurons | 16.9 $\pm$ 3.6                                       | $n_i=19$ | 3.6 $\pm$ 0.2              | $n_c=584$  | 49.8 $\pm$ 17.1                                                    | 10.4 $\pm$ 4.2 | $n_c=662$  |
| NMDA neurons | 29.4 $\pm$ 5.1                                       | $n_i=44$ | 6.2 $\pm$ 1.2              | $n_c=1660$ | 76.5 $\pm$ 14.4                                                    | 31.0 $\pm$ 7.1 | $n_c=4169$ |

**Table S2.** Average post-synaptic membrane surface, average number of gold clusters *per* synapse and average gold cluster volume *per* synapse and post-synaptic area on CTRL and NMDA mice hippocampal neurons measured on tomograms. Values are average  $\pm$  s.e.m.

|              | Average post-synaptic membrane surface ( $\mu m^2$ ) $\pm$ s.e.m. |        | Average number of gold clusters/synapse $\pm$ s.e.m. |        | Average gold cluster volume/synapse ( $\mu m^3$ ) $\pm$ s.e.m. |        | Average gold cluster volume/post synaptic area ( $\mu m$ ) $\pm$ s.e.m. |        |
|--------------|-------------------------------------------------------------------|--------|------------------------------------------------------|--------|----------------------------------------------------------------|--------|-------------------------------------------------------------------------|--------|
|              |                                                                   |        |                                                      |        |                                                                |        |                                                                         |        |
| CTRL neurons | 0.74 $\pm$ 0.11                                                   | $n=14$ | 2.6 $\pm$ 0.3                                        | $n=14$ | 0.001 $\pm$ 0.0002                                             | $n=14$ | 1.8 $\pm$ 0.3                                                           | $n=14$ |
| NMDA neurons | 0.70 $\pm$ 0.15                                                   | $n=12$ | 4.0 $\pm$ 0.6                                        | $n=12$ | 0.002 $\pm$ 0.0005                                             | $n=12$ | 3.2 $\pm$ 0.9                                                           | $n=12$ |

**Movie S1.** HAADF STEM WBP tomogram and relative 3D model of an inhibitory synapse immunolabeled for the GABA<sub>A</sub>R $\alpha$ 1 in a CTRL hippocampal neuron as shown in Figure 4A.

**Movie S2.** HAADF STEM WBP tomogram and relative 3D model of an inhibitory synapse immunolabeled for the GABA<sub>A</sub>R $\alpha$ 1 in a NMDA stimulated hippocampal neuron as shown in Figure 4B.
